# Supplementary material for: Modulation of glycogen synthase kinase-3β following TRAIL combinatorial treatment in cancer cells
Source: PubMed Central journal article supplement (PMC5341845; doi:10.18632/oncotarget.11834), 2016-09-02
Supplement: oncotarget-07-66892-s001.pdf [file oncotarget-07-66892-s001.pdf]

## Modulation of glycogen synthase kinase-3 $\beta$ following TRAIL combinatorial treatment in cancer cells

### Supplementary Materials

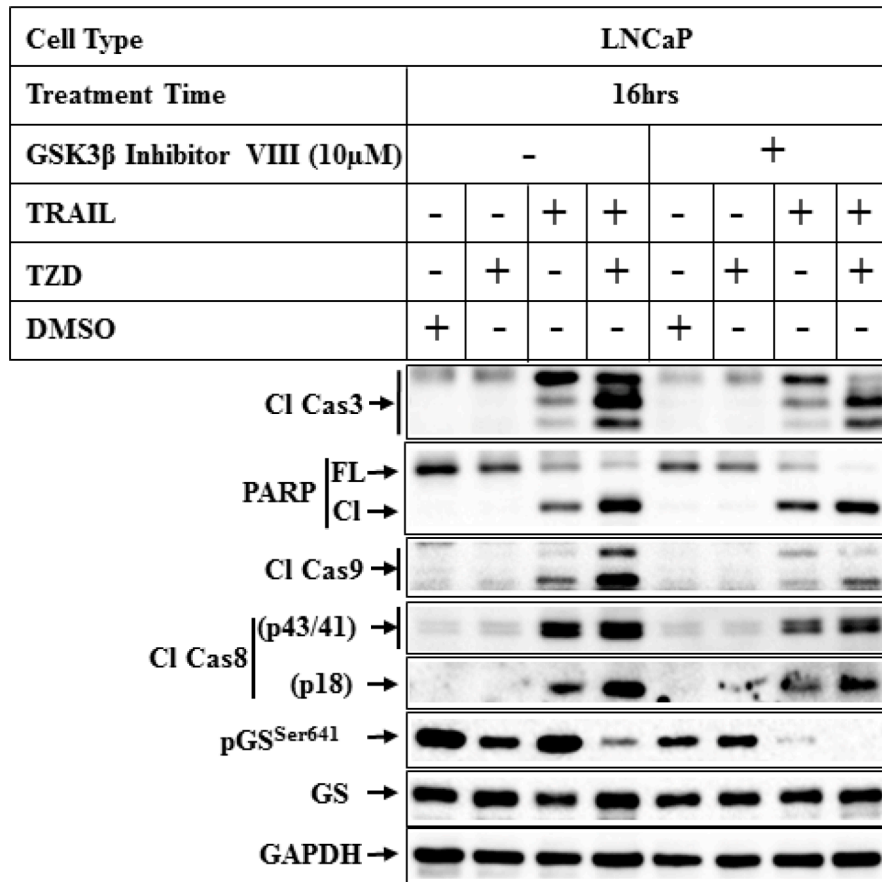

**Supplementary Figure S1: Effect of GSK3 $\beta$  inhibitor VIII on TRAIL-TZD-induced apoptosis.** LNCaP cells were pretreated with 10  $\mu$ M GSK3 $\beta$  inhibitor VIII for 1 hr followed by treatment with DMSO, TZD, TRAIL or TRAIL-TZD combination for 16 hrs. The samples were analyzed by Western blots with the indicated antibodies.

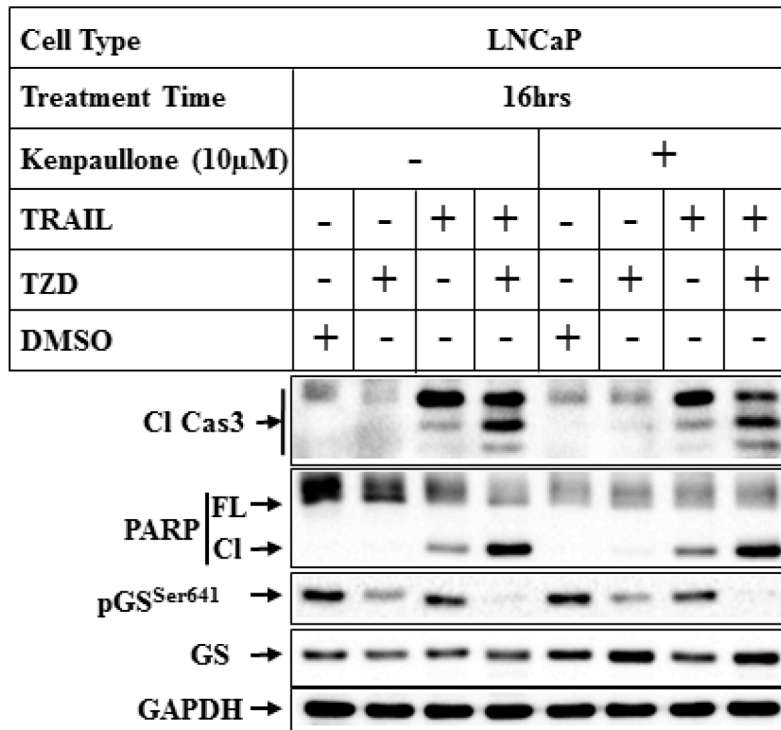

**Supplementary Figure S2: Effect of Kenpauillone on TRAIL-TZD-induced apoptosis.** LNCaP cells were pretreated with 10  $\mu$ M Kenpauillone (GSK3 $\beta$  inhibitor) for 1 hr followed by treatment with DMSO, TZD, TRAIL or TRAIL-TZD combination as in Supplementary Figure S1 and Western blot analyses.
